# Supplementary material for: Shatianyu (Citrus grandis L. Osbeck) whole fruit alleviated loperamide-induced constipation via enhancing gut microbiota-mediated intestinal serotonin secretion and mucosal barrier homeostasis
Source: Royal Society of Chemistry journal article supplement (doi:10.1039/d4fo02765e), 2024-01-01

Table S1 Formula of feed for each experimental animal group.

| Ingredient                   | Feed ratio (g/kg) |               |        |        |        |
|------------------------------|-------------------|---------------|--------|--------|--------|
|                              | NC<br>AIN-93G     | MC<br>AIN-93G | L-SWFP | M-SWFP | H-SWFP |
| Casein                       | 200               | 200           | 198.4  | 196.8  | 193.2  |
| L-Cystine                    | 3                 | 3             | 3      | 3      | 3      |
| Corn starch                  | 397.5             | 397.5         | 393.2  | 388.7  | 378.7  |
| Maltodextrin                 | 132               | 132           | 132    | 132    | 132    |
| Sucrose                      | 100               | 100           | 93.8   | 87.4   | 73     |
| Cellulose                    | 50                | 50            | 24.8   | 0      | 0      |
| Soybean                      | 70                | 70            | 69.7   | 69.4   | 68.8   |
| SWFP                         | 0                 | 0             | 45.5   | 92     | 197.8  |
| Vitamin mix V10037           | 10                | 10            | 10     | 10     | 10     |
| Mineral mix S10022G          | 35                | 35            | 35     | 35     | 35     |
| Choline bitartrate           | 2.5               | 2.5           | 2.5    | 2.5    | 2.5    |
| FD&C red dye #40             | 0                 | 0             | 0      | 0.05   | 0      |
| FD&C yellow dye #5           | 0                 | 0             | 0.05   | 0      | 0      |
| FD&C blue dye #1             | 0                 | 0             | 0      | 0      | 0.05   |
| -----<br>Feed heat ratio (%) |                   |               |        |        |        |
|                              | NC                | MC            | L-SWFP | M-SWFP | H-SWFP |
| Protein (%)                  | 20.3              | 20.3          | 20.3   | 20.3   | 20.3   |
| Carbohydrate (%)             | 63.95             | 63.95         | 63.95  | 63.95  | 63.95  |
| Fat (%)                      | 15.75             | 15.75         | 15.75  | 15.75  | 15.75  |
| -----<br>Feed heat (Kcal/g)  |                   |               |        |        |        |
|                              | NC                | MC            | L-SWFP | M-SWFP | H-SWFP |
|                              | 4                 | 4             | 3.97   | 3.93   | 3.66   |

Table S2 Primer sequences of genes for qRT-PCR analysis

| Gene name    | Forward primer              | Reverse primer              |
|--------------|-----------------------------|-----------------------------|
| Tph1         | GATCCCAAGATTGCCTGTAAAC      | TTCTCCTTTGCATCTTCAAAGC      |
| SLC6A5       | TATCCAATGGGTACTCCGCAG       | CCGTTCCCCTTGGTGAATCT        |
| 5-HT4r       | GATGCTAATGTGAGTTCCAACG      | AGGCGAGAGACACAATGAAATA      |
| Occludin     | CTCCCATCCGAGTTTCAGGT        | GCTGTCGCCTAAGGAAAGAG        |
| Claudin-1    | GACTGTGGATGTCCTGCGTTTC      | CAATTACCATCAAGGCTCGGG       |
| Zo-1         | GGGGCCTACACTGATCAAGA        | TGGAGATGAGGCTTCTGCTT        |
| TLR-4        | 5'- ATGGCATGGCTTACACCACC-3' | 5'-GAGGCCAATTTTGTCTCCACA-3' |
| IL-1 $\beta$ | GCAACTGTTCTGAACTCAACT       | ATCTTTTGGGGTCCGTCAACT       |
| TNF $\alpha$ | CCCTCACACTCAGATCATCTTCT     | GCTACGACGTGGGCTACAG         |
| FFAR2        | CACCCCTGTCCATCTTGGTC        | TACTGATCCGCAATCCTGCC        |
| FFAR3        | GGCTGGTCTGGTCAGTGTAGTC      | CCCCTGGCTGTAGGTTGC          |

Table S3 Nutritional composition of SWFP.

| Nutritional composition                     | Contents (g/100 g DW) | IDF/SDF   |
|---------------------------------------------|-----------------------|-----------|
| Water                                       | 12.5 ± 0.3            | -         |
| Protein                                     | 3.44 ± 0.07           | -         |
| Soluble sugar                               | 13.7 ± 0.3            | -         |
| Fat                                         | 0.61 ± 0.01           | -         |
| Starch                                      | 9.52 ± 0.13           | -         |
| Ash                                         | 3.24 ± 0.02           | -         |
| TDF                                         | 54.8 ± 0.8            | 7.4 ± 0.2 |
| <hr style="border-top: 1px dashed black;"/> |                       |           |
| Flavonoid components                        | Contents (mg/ g DW)   |           |
| Naringin                                    | 16.9± 0.8             | -         |
| Cigranoside B                               | 11.8 ± 1.0            | -         |
| Melitidin                                   | 7.70 ± 0.44           | -         |
| Bergamjuicin                                | 1.83 ± 0.04           | -         |
| Cigranoside A                               | 0.44 ± 0.04           | -         |
| Cigranoside C                               | 0.47± 0.05            | -         |
| Cigranoside F                               | 0.15 ± 0.00           | -         |
| Cigranoside D                               | 0.04 ± 0.00           | -         |
| Rhoifolin                                   | 0.21 ± 0.01           | -         |
| Sum                                         | 39.6 ± 2.3            | -         |

Figure S1 The correlation among fecal butyric acid contents with constipation related indicators (A, B) and serum biochemical indexes (C-F).

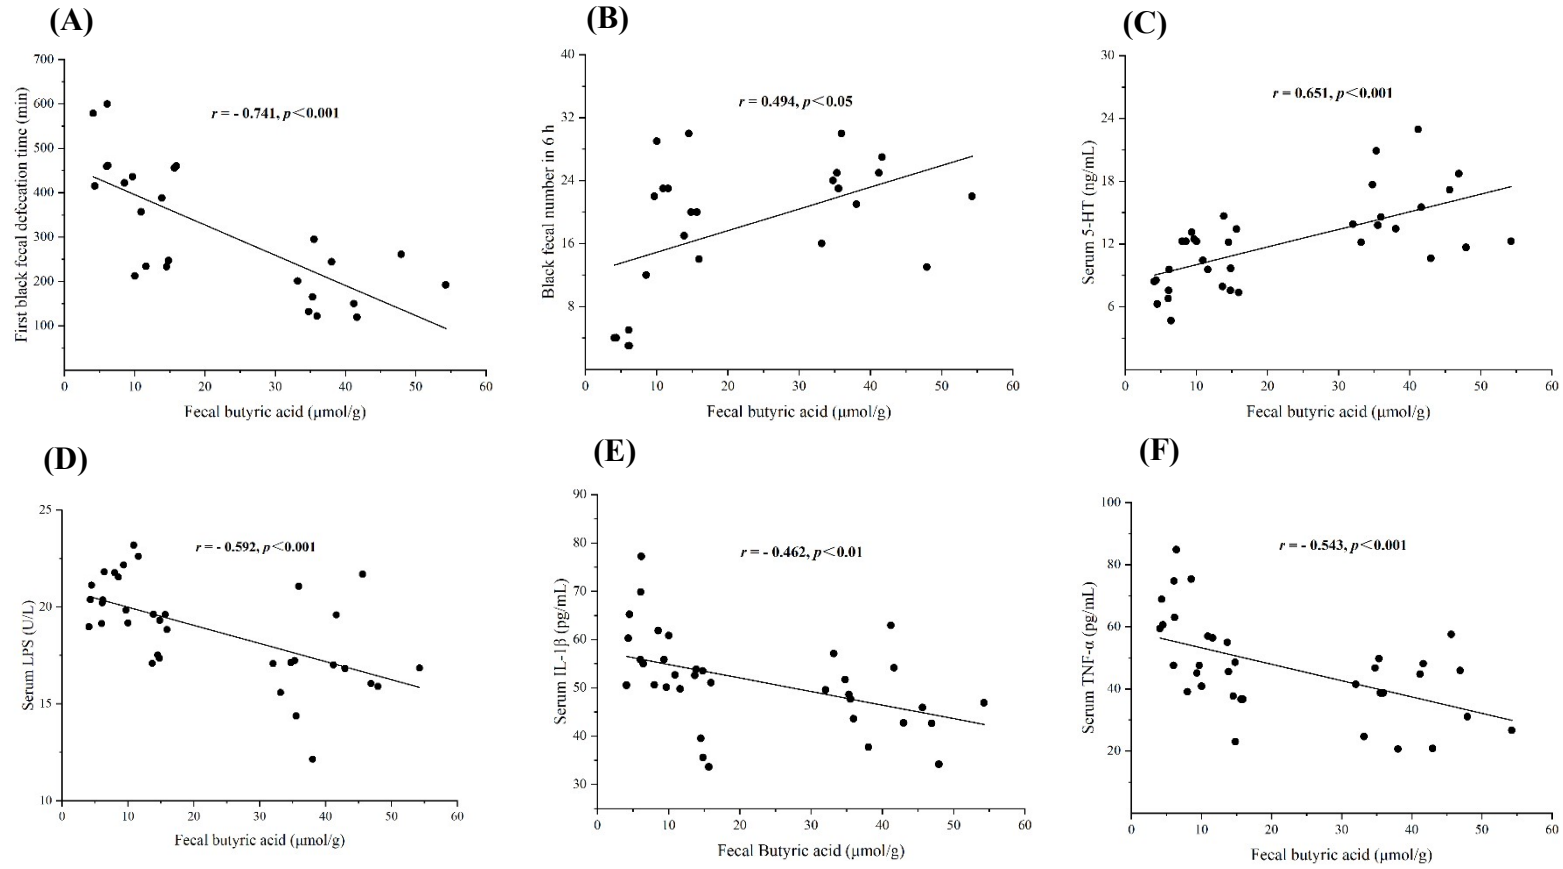

Supplement: d4fo02765e1.pdf [file d4fo02765e1.pdf]
